# Supplementary material
Source: PubMed Central journal article supplement (PMC4389606)
Supplement: rspb20142522supp1.pdf [file rspb20142522supp1.pdf]

## Appendices

**Appendix A:** Illustration of experimental design

**Appendix B:** Modified protocol for measuring phosphate

**Appendix C:** Effect of herbivory and fertilizer treatments on leaf traits

**Appendix D:** Treatments and covariates affecting aquatic decomposition rates in streams

**Appendix E:** Treatments and covariates affecting terrestrial decomposition rates in soil

### Appendix A. Illustration of experimental design

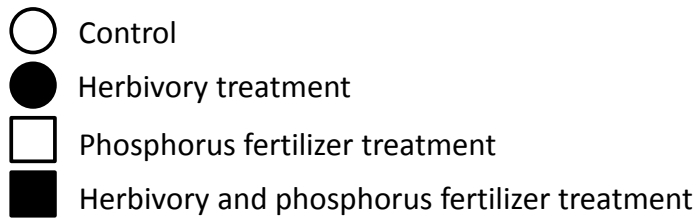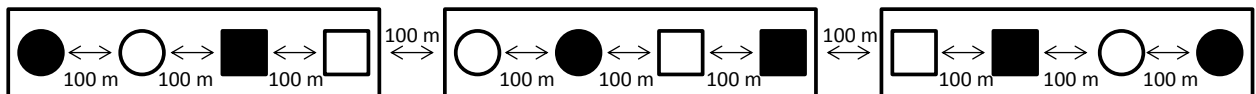

## Appendix B. Modified protocol for measuring phosphate

We boiled down 50mg of leaf powder with 0.4mL 20%  $\text{Mg}(\text{NO}_3)_2$  w/v in 95% EtOH and 10mL 1.0M HCL on a 120°C hot plate to 50% of the starting volume. We allowed samples to dry for 48 hours, covered vials with pin pricked aluminum foil caps, and ashed at 550°C in a muffle furnace for 24 hours. Ash was dissolved in 10mL of 0.1M HCL and heated in an 80°C water bath for 30 minutes. We mixed 10 $\mu$ L aliquots of sample with 990 $\mu$ L DI water and 100 $\mu$ L of mixed reagent (containing 5mL 24nM ammonium molybdate, 12.5mL 5N sulfuric acid, 5.0mL 0.31M ascorbic acid and 2.5mL 2.0mM antimony potassium tartrate) in cuvettes to measure total phosphate on a Shimadzu UV-1800 spectrophotometer at 883nm. Reference phosphate compounds returned high yields: 98.6%  $\pm$  0.78SE of 10 $\mu$ M glycerophosphate, 102.8%  $\pm$  1.33SE of 10 $\mu$ M pyrophosphate, and 93.9%  $\pm$  0.50SE of 10 $\mu$ M 5'adenosine monophosphate. We chose 50mg of leaf material per sample after trials of 10, 25, 50 and 100mg. We ran each batch of samples against a five point standard curve of  $\text{KH}_2\text{PO}_4$  from 0 – 10.0 $\mu$ M. To control for across batch variation, we ran controls of 10 $\mu$ M 5'adenosine monophosphate, which was chosen because it was the most difficult reference compound to obtain high yields. All batches yielded 90.5 - 99.8% of the expectation for 10 $\mu$ M 5'adenosine monophosphate, and correcting for these slight differences did not change conclusions.

Appendix C. Effect of herbivory and fertilizer treatments on leaf traits

Table C1. Percent nitrogen of red alder leaves before an herbivory and fertilizer treatment.

| Source                 | df | SS    | MS    | <i>F</i> | P ( <i>F</i> = 1) |
|------------------------|----|-------|-------|----------|-------------------|
| Herbivory treatment    | 1  | 0.183 | 0.183 | 1.110    | 0.297             |
| Fertilizer treatment   | 1  | 0.438 | 0.438 | 2.650    | 0.109             |
| Herbivory x Fertilizer | 1  | 0.327 | 0.327 | 1.976    | 0.165             |
| Block                  | 20 | 4.238 | 0.212 | 1.282    | 0.229             |
| Error                  | 57 | 9.424 | 0.165 |          |                   |

Table C2. Change in percent phosphorus of red alder leaves following an herbivory and fertilizer treatment.

| Source                 | df | SS    | MS    | <i>F</i> | P ( <i>F</i> = 1) |
|------------------------|----|-------|-------|----------|-------------------|
| Herbivory treatment    | 1  | 11    | 11.1  | 0.060    | 0.807             |
| Fertilizer treatment   | 1  | 680   | 680.2 | 3.698    | 0.0594            |
| Herbivory x Fertilizer | 1  | 15    | 14.7  | 0.080    | 0.7784            |
| Block                  | 20 | 7400  | 370.0 | 2.011    | 0.0203            |
| Error                  | 58 | 10669 | 183.9 |          |                   |

Table C3. Change in percent carbon of red alder leaves following an herbivory and fertilizer treatment.

| Source                 | df | SS   | MS     | <i>F</i> | P ( <i>F</i> = 1) |
|------------------------|----|------|--------|----------|-------------------|
| Herbivory treatment    | 1  | 126  | 125.77 | 1.055    | 0.310             |
| Fertilizer treatment   | 1  | 33   | 32.58  | 0.273    | 0.604             |
| Herbivory x Fertilizer | 1  | 103  | 102.68 | 0.861    | 0.358             |
| Block                  | 17 | 2732 | 160.72 | 1.348    | 0.205             |
| Error                  | 48 | 5723 | 119.22 |          |                   |

Table C4. Effects of herbivory and fertilizer treatments on several leaf trait variables via multiple analysis of variance

| Source                     | df | Wilk's $\lambda$ |                     | <i>F</i>            | P ( <i>F</i> = 1) |
|----------------------------|----|------------------|---------------------|---------------------|-------------------|
|                            |    | SS               | MS                  |                     |                   |
| Herbivory treatment        | 1  | 0.529            |                     | 3.661               | 0.00235           |
| Leaf Thickness             |    |                  | 4.460 <sup>-6</sup> | 4.460 <sup>-6</sup> | 2.0367            |
| % Nitrogen final           |    |                  | 2.256               | 2.256               | 8.290             |
| % Carbon final             |    |                  | 18.58               | 18.581              | 0.710             |
| % Phosphorus final         |    |                  | 8.8 <sup>-5</sup>   | 8.8 <sup>-5</sup>   | 0.115             |
| Carbon: Nitrogen final     |    |                  | 229.13              | 229.125             | 9.739             |
| Carbon: Phosphorus final   |    |                  | 1                   | 0.6                 | 0.0002            |
| Nitrogen: Phosphorus final |    |                  | 97.77               | 97.767              | 13.414            |

|                               |    |        |              |              |        |        |
|-------------------------------|----|--------|--------------|--------------|--------|--------|
| $^{13}\text{C}/^{12}\text{C}$ |    |        | 1.939        | 1.939        | 1.707  | 0.198  |
| $^{15}\text{N}/^{14}\text{N}$ |    |        | 0.0096       | 0.00956      | 0.102  | 0.751  |
| Fertilizer treatment          | 1  | 0.863  |              |              | 0.651  | 0.746  |
| Leaf Thickness                |    |        | $9.167^{-6}$ | $9.167^{-6}$ | 4.187  | 0.0466 |
| % Nitrogen final              |    |        | 0.0496       | 0.0496       | 0.182  | 0.671  |
| % Carbon final                |    |        | 25.97        | 25.970       | 0.992  | 0.325  |
| % Phosphorus final            |    |        | $1.32^{-4}$  | $1.32^{-4}$  | 0.172  | 0.680  |
| Carbon: Nitrogen final        |    |        | 53.70        | 53.704       | 2.283  | 0.138  |
| Carbon: Phosphorus final      |    |        | 5534         | 5533.9       | 1.566  | 0.217  |
| Nitrogen: Phosphorus final    |    |        | 0.41         | 0.408        | 0.0560 | 0.814  |
| $^{13}\text{C}/^{12}\text{C}$ |    |        | 2.089        | 2.089        | 1.839  | 0.182  |
| $^{15}\text{N}/^{14}\text{N}$ |    |        | 0.0472       | 0.0472       | 0.505  | 0.481  |
| Herbivory x Fertilizer        | 1  | 0.937  |              |              | 0.276  | 0.977  |
| Leaf Thickness                |    |        | $2.210^{-7}$ | $2.215^{-7}$ | 0.101  | 0.752  |
| % Nitrogen final              |    |        | 0.0072       | 0.00718      | 0.0264 | 0.872  |
| % Carbon final                |    |        | 15.01        | 15.014       | 0.574  | 0.453  |
| % Phosphorus final            |    |        | $7.6^{-5}$   | $7.614^{-5}$ | 0.0993 | 0.754  |
| Carbon: Nitrogen final        |    |        | 11.89        | 11.887       | 0.0505 | 0.481  |
| Carbon: Phosphorus final      |    |        | 842          | 842.5        | 0.238  | 0.628  |
| Nitrogen: Phosphorus final    |    |        | 0.00         | 0.00         | 0.00   | 0.999  |
| $^{13}\text{C}/^{12}\text{C}$ |    |        | 0.115        | 0.115        | 0.102  | 0.752  |
| $^{15}\text{N}/^{14}\text{N}$ |    |        | 0.0293       | 0.0293       | 0.313  | 0.579  |
| Block                         | 17 | 0.0238 |              |              | 1.216  | 0.0763 |
| Leaf Thickness                |    |        | $7.512^{-5}$ | $4.419^{-6}$ | 2.0182 | 0.0308 |
| % Nitrogen final              |    |        | 5.167        | 0.304        | 1.117  | 0.369  |
| % Carbon final                |    |        | 515.64       | 30.332       | 1.159  | 0.335  |
| % Phosphorus final            |    |        | 0.0262       | 0.00154      | 2.0067 | 0.0319 |
| Carbon: Nitrogen final        |    |        | 904.43       | 53.202       | 2.261  | 0.0149 |
| Carbon: Phosphorus final      |    |        | 130761       | 7691.8       | 2.176  | 0.0192 |
| Nitrogen: Phosphorus final    |    |        | 94.46        | 5.556        | 0.762  | 0.723  |
| $^{13}\text{C}/^{12}\text{C}$ |    |        | 23.098       | 1.359        | 1.196  | 0.306  |
| $^{15}\text{N}/^{14}\text{N}$ |    |        | 1.544        | 0.0908       | 0.971  | 0.505  |
| Error                         | 45 |        |              |              |        |        |
| Leaf Thickness                |    |        | $9.853^{-5}$ | $2.190^{-6}$ |        |        |
| % Nitrogen final              |    |        | 12.245       | 0.272        |        |        |
| % Carbon final                |    |        | 1178.1       | 26.180       |        |        |
| % Phosphorus final            |    |        | 0.0345       | $7.667^{-4}$ |        |        |
| Carbon: Nitrogen final        |    |        | 1058.65      | 23.526       |        |        |
| Carbon: Phosphorus final      |    |        | 159041       | 3534.2       |        |        |
| Nitrogen: Phosphorus final    |    |        | 327.98       | 7.288        |        |        |
| $^{13}\text{C}/^{12}\text{C}$ |    |        | 51.118       | 1.136        |        |        |
| $^{15}\text{N}/^{14}\text{N}$ |    |        | 4.209        | 0.0935       |        |        |

Appendix D. Treatments and covariates affecting aquatic decomposition rates in streams

Table D1. Effects of an herbivory treatment and fertilizer treatment on eventual decomposition in stream environments.

| Source                 | df | SS    | MS     | <i>F</i> | <i>P</i> ( <i>F</i> = 1) |
|------------------------|----|-------|--------|----------|--------------------------|
| Herbivory treatment    | 1  | 0.410 | 0.410  | 8.605    | 0.00559                  |
| Fertilizer treatment   | 1  | 0.082 | 0.0820 | 1.723    | 0.197                    |
| Herbivory x Fertilizer | 1  | 0.247 | 0.247  | 5.179    | 0.0284                   |
| Block                  | 13 | 5.484 | 0.422  | 8.863    | <0.001                   |
| Deployment Location    | 4  | 5.119 | 1.280  | 26.888   | <0.001                   |
| Land Source            | 9  | 0.365 | 0.0405 | 0.851    | 0.575                    |
| Error                  | 39 | 1.856 | 0.0476 |          |                          |

Table D2. Effects of fertilizer and herbivory treatments on eventual decomposition in stream environments after adjusting for river location and C:N. Testing the herbivory treatment after removing nutrient differences indicates the herbivory treatment was largely a result of nutrient changes, and after removing effects of C:N, the phosphorus fertilizer treatment was significant.

| Source                 | df | SS     | MS     | <i>F</i> | <i>P</i> ( <i>F</i> = 1) |
|------------------------|----|--------|--------|----------|--------------------------|
| Herbivory Treatment    | 1  | 0.0410 | 0.0410 | 1.245    | 0.272                    |
| Fertilizer Treatment   | 1  | 0.143  | 0.143  | 4.329    | 0.0443                   |
| Herbivory x Fertilizer | 1  | 0.124  | 0.124  | 3.769    | 0.0597                   |
| Carbon: Nitrogen       | 1  | 1.157  | 1.157  | 35.107   | <0.001                   |
| Block                  | 13 | 5.484  | 0.422  | 12.805   | <0.001                   |
| Deployment Location    | 4  | 5.119  | 1.280  | 38.849   | <0.001                   |
| Land Source            | 9  | 0.243  | 0.0270 | 0.819    | 0.602                    |
| Error                  | 38 | 1.252  | 0.0329 |          |                          |

Table D3. Standardized coefficients from type III stepwise regression ( $F_{2,53} = 13.3$ ,  $p < 0.001$ ) showing the effects of various leaf traits on aquatic decomposition. Variables excluded from the model were tree trunk diameter, nitrogen: phosphorus, carbon: phosphorus,  $^{13}\text{C}/^{12}\text{C}$ , and leaf thickness.

| Source                        | Estimated | t value | Pr(> t ) |
|-------------------------------|-----------|---------|----------|
| Carbon: Nitrogen              | -0.203    | -4.725  | 0.000133 |
| $^{15}\text{N}/^{14}\text{N}$ | 0.100     | 2.330   | 0.00711  |

Fig D1. Illustration of herbivory and fertilizer treatments on leaf traits and covariates influencing aquatic and terrestrial soil decomposition. Thick lines are significant ( $p < 0.05$ ) and thin lines are non-significant variables included in stepwise multiple regressions (Table D3, Table E2). Standardized coefficients are reported for effect size comparisons. Significance values of

herbivory treatment on leaf traits obtained from paired t-tests (thick lines,  $p < 0.01$ ; thin lines,  $p < 0.05$ ). Significance of residual effect of fertilizer treatment on aquatic decomposition obtained from Table C2.

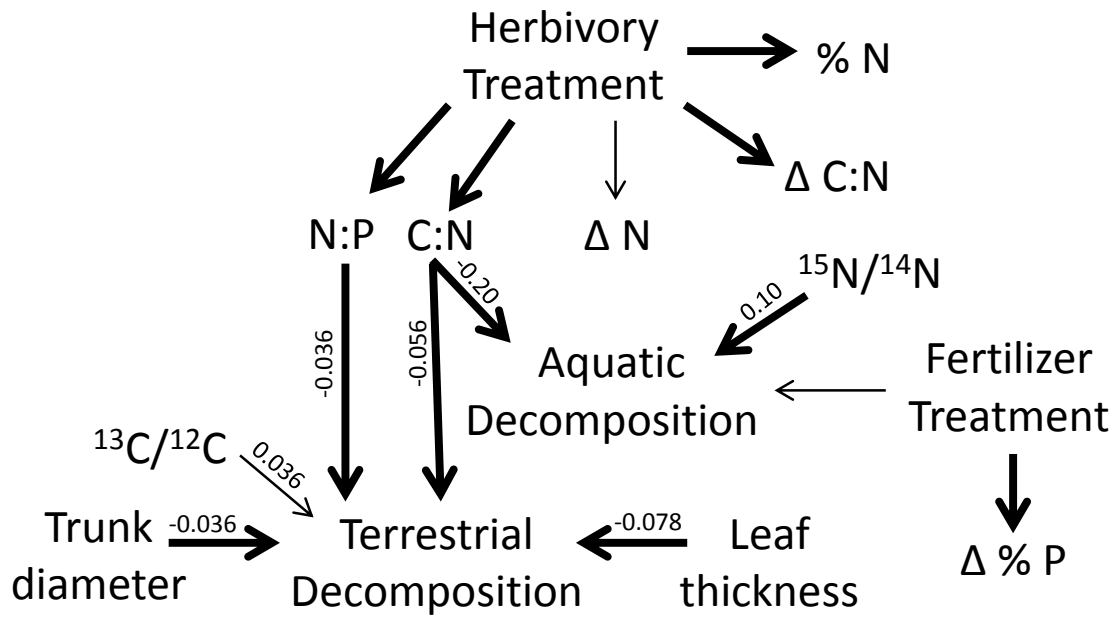

Appendix E. Treatments and covariates affecting terrestrial decomposition rates in soil.

Table E1. Effects of an herbivory treatment, fertilizer treatment and leaf source on eventual decomposition in terrestrial soil environments.

| Source                 | df | SS     | MS      | <i>F</i> | <i>P</i> ( <i>F</i> = 1) |
|------------------------|----|--------|---------|----------|--------------------------|
| Leaf source            | 1  | 0.0607 | 0.0607  | 7.406    | 0.00857                  |
| Herbivory treatment    | 1  | 0.0056 | 0.00562 | 0.686    | 0.411                    |
| Fertilizer treatment   | 1  | 0.0020 | 0.00202 | 0.246    | 0.622                    |
| Herbivory x Fertilizer | 1  | 0.0089 | 0.0089  | 1.089    | 0.301                    |
| Block                  | 20 | 1.151  | 0.0575  | 7.024    | <0.001                   |
| Error                  | 58 | 0.475  | 0.00819 |          |                          |

Table E2. Standardized coefficients from type III stepwise regression ( $F_{5,56} = 9.967$ ,  $p < 0.001$ ), showing the association of various leaf traits on terrestrial soil decomposition. Variables excluded from the model were  $^{15}\text{N}/^{14}\text{N}$ , carbon: phosphorus.

| Source                        | Estimated | t value | Pr(> t ) |
|-------------------------------|-----------|---------|----------|
| Leaf thickness                | -0.0779   | -4.007  | 0.000183 |
| Carbon: Nitrogen              | -0.0563   | -3.123  | 0.00283  |
| Trunk diameter                | -0.03589  | -2.395  | 0.0200   |
| Nitrogen: Phosphorus          | -0.0362   | -2.035  | 0.0466   |
| $^{13}\text{C}/^{12}\text{C}$ | 0.0358    | 1.862   | 0.0678   |
